# Supplementary material for: Associations of Long-Term PM 2.5 Exposure and Physical Activity on Sleep: A Prospective Cohort Study
Source: Research Square preprint supplement (doi:10.21203/rs.3.rs-8078391/v1), 2025-12-01
Supplement: Supplementary file 1 [file 19d1deff3cf8c56c87293f18.docx]

**Associations of Long-Term PM2.5 Exposure and Physical Activity on Sleep: A Prospective Cohort Study**

**Supplementary materials**

**Supplemental Table 1.** Details of the Questionnaire for the 6 Sleep Behaviors Comprising the Sleep Score.

**Supplementary Table 2.** Percentages of Participants With Missing Covariates in the Questionnaire-Based Cohort.

**Supplementary Table 3.** Percentages of Participants With Missing Covariates in the Accelerometer-Measured Cohort.

**Supplemental Table 4.** Descriptive Analysis of the Accelerometer-Measured Cohort.

**Supplemental Table 5** Comparison of Characteristics of participants in the questionnaire-based cohort: Data exclusion (n=498,423→293,980).

**Supplemental Table 6** Comparison of Characteristics of participants in the accelerometer-measured cohort: Data exclusion (n=103,684 → 63,474).

**Supplemental Table 7** GVIF Results for Independent Model of Physical Activity and PM2.5 with Sleep in the Questionnaire-Based Cohort.

**Supplemental Table 8** GVIF Results for Interaction Model of Physical Activity and PM2.5 with Sleep in the Questionnaire-Based Cohort.

**Supplemental Table 9** GVIF Results for Independent Model of Physical Activity and PM2.5 with Sleep in the Accelerometer-Measured Cohort.

**Supplemental Table 10** GVIF Results for Interaction Model of Physical Activity and PM2.5 with Sleep in the Accelerometer-Measured Cohort.

**Supplemental Table11** Sleep score and sleep duration change with 10 unit increase in PA and 10 μg/m3 increase in PM2.5 (Before Excluding Participants with Pre-Baseline Sleep Disorders)

**Supplemental Table12** Sleep score and sleep duration change with 10 unit increase in PA and 10 μg/m3 increase in PM2.5 (Diagnosed With Sleep Disorder)

**Supplemental Figure 1.** Nonlinear Association of PM2.5 and Physical Activity With Sleep Score and Sleep Duration in the Accelerometer-Measured Cohort.

**Supplemental Figure 2.** Nonlinear Association of PM2.5 and the Ratio of Physical Activity to Sedentary Time With Sleep Score and Sleep Duration in the Accelerometer-Measured Cohort

**Supplemental Figure 3.** Dose-response relationship of PM2.5 and PA on sleep duration.

**Supplemental Section 1**

We excluded those with poor accelerometer data quality based on the following criteria: data labeled as "no" in UKB field 90015 (Data quality, good wear time); wear duration of less than six days according to UKB field 90051 (Wear duration overall); and an original sequence length of fewer than 120,960 data points (as data should be recorded every five seconds over seven days, with missing values represented as NA even if the device was not worn). A total of 20,450 individuals were removed based on these criteria.

**Supplemental Section 2**

In the questionnaire-based cohort analysis, we observed that when MVPA exceeds 40 MET-hours/week (6.67 hours/week), the decline in sleep duration becomes more rapid (Supplementary Fig. S2f). Additionally, in the questionnaire-based cohort, when PM2.5 levels were at 5 µg/m³, an increase in walking did not significantly change sleep duration. However, when PM2.5 levels were at 10 and 15 µg/m³, an increase in walking was associated with a decrease in sleep duration (Supplementary Fig. S2b). In the accelerometer-measured cohort, we observed a relatively linear decline in the dose-response relationship between PA (both LPA and MVPA) and sleep duration, without any significant extremities being noted (Supplementary Fig. S2c, Fig. S3g, Fig. S3k and Fig. S3o).

**Supplemental Table 1 Details of the Questionnaire for the 6 Sleep Behaviors Comprising the Sleep Score.**

| **Sleep behaviors** | **Question Stem** | **Responses** | **Validations** | **Hints** |
| --- | --- | --- | --- | --- |
| **Sleep duration** | About how many hours sleep do you get in  every 24 hours? (please include naps) | Enter INTEGER  OR  -1 : Do not know  OR  -3 : Prefer not to answer | Require: ≥ 1, ≤  23  Expect: ≥ 3, ≤  12  Units: hours | If the time you spend sleeping varies a  lot, give the average time for a 24 hour  day in the last 4 weeks. |
| **Getting up in morning** | On an average day, how easy do you find  getting up in the morning? | SELECT one of 6 from  1 : Not at all easy  2 : Not very easy  3 : Fairly easy  4 : Very easy  -1 : Do not know  -3 : Prefer not to answer |  | If this varies a lot, answer this question  in relation to the last 4 weeks. |
| **Chronotype** | Do you consider yourself to be? | SELECT one of 6 from  1 : Definitely a 'morning'  person  2 : More a 'morning' than  'evening' person  3 : More an 'evening' than a  'morning' person  4 : Definitely an 'evening'  person  -1 : Do not know  -3 : Prefer not to answer |  | If this varies a lot, answer this question  in relation to the last 4 weeks. |
| **Insomnia** | Do you have trouble falling asleep at night  or do you wake up in the middle of the  night? | SELECT one of 4 from  1 : Never/rarely  2 : Sometimes  3 : Usually  -3 : Prefer not to answer |  | If this varies a lot, answer this question  in relation to the last 4 weeks. |
| **Snoring** | Does your partner or a close relative or  friend complain about your snoring? | SELECT one of 4 from  1 : Yes  2 : No  -1 : Do not know  -3 : Prefer not to answer |  | If you are unsure, please provide an  estimate or select Do not know. |
| **Daytime sleepiness** | How likely are you to doze off or fall  asleep during the daytime when you don't  mean to? (e.g. when working, reading or  driving) | SELECT one of 5 from  0 : Never/rarely  1 : Sometimes  2 : Often  -1 : Do not know  -3 : Prefer not to answer |  | If you are unsure, please provide an  estimate or select Do not know. |

**Supplementary Table 2. The percentages of participants with missing covariates involved in questionnaire-based cohort**

| **Characteristic** | **Percentage of missing data** |
| --- | --- |
| BMI | 0.62% |
| Age | 0.00% |
| Sex | 0.00% |
| Cookedvegetableintake | 0.18% |
| Freshfruitintake | 0.18% |
| Waterintake | 0.18% |
| Neuroticismscore | 19.09% |
| Averagenighttimesoundlevelofnoisepollution | 1.47% |
| Timespentoutdoorsinwinter | 0.93% |
| Timespendoutdoorsinsummer | 0.93% |
| Alcoholintakefrequency | 0.18% |
| Lengthofmobilephoneuse | 0.18% |
| Playscomputergames | 0.18% |
| Qualifications | 0.92% |
| Averagetotalhouseholdincomebeforetax | 1.20% |
| Frequencyoffriendfamilyvisits | 1.58% |

**Supplementary Table 3.** **The percentages of participants with missing covariates involved in accelerometer-measured cohort**

| **Characteristic** | **Percentage of missing data** |
| --- | --- |
| BMI | 0.00% |
| Age | 0.00% |
| Sex | 0.00% |
| Cookedvegetableintake | 0.00% |
| Freshfruitintake | 0.24% |
| Waterintake | 0.24% |
| Neuroticismscore | 18.52% |
| Averagenighttimesoundlevelofnoisepollution | 11.62% |
| Timespentoutdoorsinwinter | 0.00% |
| Timespendoutdoorsinsummer | 0.00% |
| Alcoholintakefrequency | 0.00% |
| Lengthofmobilephoneuse | 0.00% |
| Playscomputergames | 0.00% |
| Qualifications | 0.00% |
| Averagetotalhouseholdincomebeforetax | 0.00% |
| Frequencyoffriendfamilyvisits | 9.62% |

**Supplemental Table** **4 Descriptive analysis of the accelerometer-measured cohort.**

|  | **Sleep score** | | | |
| --- | --- | --- | --- | --- |
| **Variables** | **Excellent (N=33,745)** | **Average (N=28,400)** | **Poor (N=1,329)** | **Total (N=63,474)** |
| **LPA (MET-hours/week)** |  |  |  |  |
| Mean (SD) | 109 (34.1) | 105 (33.8) | 101 (35.7) | 107 (34.1) |
| Median [Min, Max] | 106 [0, 296] | 102 [0, 264] | 98.3 [2.11, 234] | 104 [0, 296] |
| **MVPA (MET-hours/week)** |  |  |  |  |
| Mean (SD) | 31.1 (25.1) | 26.6 (22.7) | 20.7 (19.7) | 28.8 (24.1) |
| Median [Min, Max] | 25.1 [0, 251] | 21.0 [0, 300] | 15.6 [0, 146] | 23.0 [0, 300] |
| **Sleep duration(hours/day)** |  |  |  |  |
| Mean (SD) | 8.73 (1.17) | 8.94 (1.22) | 9.01 (1.36) | 8.83 (1.20) |
| Median [Min, Max] | 8.60 [1.16, 17.5] | 8.83 [1.95, 17.4] | 8.87 [3.00, 15.2] | 8.71 [1.16, 17.5] |
| **Annual PM2.5 (μg/m³)** |  |  |  |  |
| Mean (SD) | 9.86 (1.02) | 9.90 (1.02) | 10.1 (1.06) | 9.88 (1.02) |
| Median [Min, Max] | 9.82 [8.17, 19.8] | 9.86 [8.17, 18.3] | 10.1 [8.17, 15.3] | 9.84 [8.17, 19.8] |
| **Age at Start time of wear (Years)** |  |  |  |  |
| Mean (SD) | 62.7 (7.84) | 62.2 (7.79) | 61.3 (7.83) | 62.4 (7.83) |
| Median [Min, Max] | 63.9 [43.6, 79.0] | 63.3 [43.5, 78.9] | 61.7 [43.7, 77.3] | 63.6 [43.5, 79.0] |
| **Sex** |  |  |  |  |
| Female | 18706 (55.4%) | 16569 (58.3%) | 832 (62.6%) | 36107 (56.9%) |
| Male | 15039 (44.6%) | 11831 (41.7%) | 497 (37.4%) | 27367 (43.1%) |
| **BMI (kg/m2)** |  |  |  |  |
| Mean (SD) | 26.3 (4.28) | 27.0 (4.68) | 28.7 (5.72) | 26.7 (4.52) |
| Median [Min, Max] | 25.7 [12.7, 58.7] | 26.3 [12.1, 59.1] | 27.8 [17.1, 58.6] | 26.0 [12.1, 59.1] |
| **Ethnic Background** |  |  |  |  |
| Others | 1084 (3.2%) | 964 (3.4%) | 68 (5.1%) | 2116 (3.3%) |
| White | 32661 (96.8%) | 27436 (96.6%) | 1261 (94.9%) | 61358 (96.7%) |
| **Alcohol intake frequency** |  |  |  |  |
| Daily or almost daily | 7263 (21.5%) | 6429 (22.6%) | 272 (20.5%) | 13964 (22.0%) |
| Three or four times a week | 8870 (26.3%) | 7470 (26.3%) | 273 (20.5%) | 16613 (26.2%) |
| Once or twice a week | 8603 (25.5%) | 7111 (25.0%) | 307 (23.1%) | 16021 (25.2%) |
| One to three times a month | 3628 (10.8%) | 3077 (10.8%) | 189 (14.2%) | 6894 (10.9%) |
| Special occasions only | 3236 (9.6%) | 2789 (9.8%) | 194 (14.6%) | 6219 (9.8%) |
| Never | 2143 (6.4%) | 1515 (5.3%) | 93 (7.0%) | 3751 (5.9%) |
| **Length of mobile phone use** |  |  |  |  |
| Never used mobile phone at least once per week | 4512 (13.4%) | 3668 (12.9%) | 165 (12.4%) | 8345 (13.1%) |
| One year or less | 572 (1.7%) | 484 (1.7%) | 24 (1.8%) | 1080 (1.7%) |
| Two to four years | 4199 (12.4%) | 3460 (12.2%) | 149 (11.2%) | 7808 (12.3%) |
| Five to eight years | 9183 (27.2%) | 7980 (28.1%) | 347 (26.1%) | 17510 (27.6%) |
| More than eight years | 15257 (45.2%) | 12795 (45.1%) | 644 (48.5%) | 28696 (45.2%) |
| Prefer not to answer | 22 (0.1%) | 13 (0.0%) | 0 (0%) | 35 (0.1%) |
| **Play computer games** |  |  |  |  |
| Never/rarely | 26619 (78.9%) | 21248 (74.8%) | 932 (70.1%) | 48799 (76.9%) |
| Sometimes | 5917 (17.5%) | 5794 (20.4%) | 298 (22.4%) | 12009 (18.9%) |
| Often | 1198 (3.6%) | 1349 (4.8%) | 99 (7.4%) | 2646 (4.2%) |
| Prefer not to answer | 11 (0.0%) | 9 (0.0%) | 0 (0%) | 20 (0.0%) |
| **Townsend deprivation index** |  |  |  |  |
| Mean (SD) | -1.89 (2.70) | -1.77 (2.78) | -1.18 (3.06) | -1.82 (2.75) |
| Median [Min, Max] | -2.56 [-6.26, 10.1] | -2.48 [-6.26, 9.52] | -1.93 [-6.18, 8.94] | -2.52 [-6.26, 10.1] |
| **Neuroticism score** |  |  |  |  |
| Mean (SD) | 3.18 (2.82) | 4.09 (3.09) | 5.47 (3.49) | 3.64 (3.01) |
| Median [Min, Max] | 2.00 [0, 12.0] | 4.00 [0, 12.0] | 5.00 [0, 12.0] | 3.00 [0, 12.0] |
| **Qualifications** |  |  |  |  |
| College or University degree | 14588 (43.2%) | 12020 (42.3%) | 552 (41.5%) | 27160 (42.8%) |
| A levels/AS levels or equivalent | 4325 (12.8%) | 3927 (13.8%) | 189 (14.2%) | 8441 (13.3%) |
| O levels/GCSEs or equivalent | 7050 (20.9%) | 6006 (21.1%) | 267 (20.1%) | 13323 (21.0%) |
| CSEs or equivalent | 1369 (4.1%) | 1204 (4.2%) | 61 (4.6%) | 2634 (4.1%) |
| NVQ or HND or HNC or equivalent | 1788 (5.3%) | 1515 (5.3%) | 71 (5.3%) | 3374 (5.3%) |
| Other professional qualifications eg: nursing,teaching | 1754 (5.2%) | 1339 (4.7%) | 68 (5.1%) | 3161 (5.0%) |
| None of the above | 2765 (8.2%) | 2320 (8.2%) | 114 (8.6%) | 5199 (8.2%) |
| Prefer not to answer | 106 (0.3%) | 69 (0.2%) | 7 (0.5%) | 182 (0.3%) |
| **Cooked vegetable intake** |  |  |  |  |
| Mean (SD) | 2.65 (2.28) | 2.55 (2.53) | 2.31 (2.82) | 2.60 (2.41) |
| Median [Min, Max] | 3.00 [-10.0, 42.0] | 2.00 [-10.0, 50.0] | 2.00 [-10.0, 33.0] | 3.00 [-10.0, 50.0] |
| **Fresh fruit intake** |  |  |  |  |
| Mean (SD) | 2.11 (2.43) | 1.81 (2.65) | 1.59 (2.97) | 1.96 (2.55) |
| Median [Min, Max] | 2.00 [-10.0, 40.0] | 2.00 [-10.0, 43.0] | 2.00 [-10.0, 12.0] | 2.00 [-10.0, 43.0] |
| **Smoking status** |  |  |  |  |
| No | 20166 (59.8%) | 15487 (54.5%) | 655 (49.3%) | 36308 (57.2%) |
| Yes, on most or all days | 11850 (35.1%) | 10863 (38.3%) | 482 (36.3%) | 23195 (36.5%) |
| Only occasionally | 1665 (4.9%) | 1996 (7.0%) | 192 (14.4%) | 3853 (6.1%) |
| Prefer not to answer | 64 (0.2%) | 54 (0.2%) | 0 (0%) | 118 (0.2%) |
| **Average total household income before tax** |  |  |  |  |
| Less than £18,000 | 3970 (11.8%) | 3481 (12.3%) | 231 (17.4%) | 7682 (12.1%) |
| £18,000 to £30,999 | 7202 (21.3%) | 6195 (21.8%) | 302 (22.7%) | 13699 (21.6%) |
| £31,000 to £51,999 | 8916 (26.4%) | 7473 (26.3%) | 323 (24.3%) | 16712 (26.3%) |
| £52,000 to £100,000 | 8066 (23.9%) | 6835 (24.1%) | 276 (20.8%) | 15177 (23.9%) |
| Greater than £100,000 | 2513 (7.4%) | 1758 (6.2%) | 69 (5.2%) | 4340 (6.8%) |
| Do not to know | 764 (2.3%) | 682 (2.4%) | 35 (2.6%) | 1481 (2.3%) |
| Prefer not to answer | 2314 (6.9%) | 1976 (7.0%) | 93 (7.0%) | 4383 (6.9%) |
| **Frequency of friend family visits** |  |  |  |  |
| Almost daily | 3257 (9.7%) | 2571 (9.1%) | 125 (9.4%) | 5953 (9.4%) |
| 2-4 times a week | 10174 (30.1%) | 8329 (29.3%) | 343 (25.8%) | 18846 (29.7%) |
| About once a week | 12486 (37.0%) | 10688 (37.6%) | 504 (37.9%) | 23678 (37.3%) |
| About once a month | 5185 (15.4%) | 4385 (15.4%) | 219 (16.5%) | 9789 (15.4%) |
| Once every few months | 2286 (6.8%) | 2094 (7.4%) | 110 (8.3%) | 4490 (7.1%) |
| Never or almost never | 325 (1.0%) | 304 (1.1%) | 28 (2.1%) | 657 (1.0%) |
| No friends/family outside household | 32 (0.1%) | 29 (0.1%) | 0 (0%) | 61 (0.1%) |
| **Average night time sound level of noise pollution** |  |  |  |  |
| Mean (SD) | 46.5 (4.21) | 46.5 (4.18) | 46.6 (4.31) | 46.5 (4.20) |
| Median [Min, Max] | 45.4 [42.1, 74.9] | 45.4 [42.1, 74.0] | 45.4 [42.1, 67.9] | 45.4 [42.1, 74.9] |
| **Time spent outdoors in winter** |  |  |  |  |
| Mean (SD) | 0.259 (4.50) | -0.506 (4.84) | -1.32 (5.36) | -0.117 (4.69) |
| Median [Min, Max] | 1.00 [-10.0, 20.0] | 1.00 [-10.0, 15.0] | 1.00 [-10.0, 12.0] | 1.00 [-10.0, 20.0] |
| **Time spend outdoors in summer** |  |  |  |  |
| Mean (SD) | 3.28 (3.29) | 2.81 (3.52) | 2.04 (4.46) | 3.04 (3.43) |
| Median [Min, Max] | 3.00 [-10.0, 24.0] | 3.00 [-10.0, 24.0] | 3.00 [-10.0, 16.0] | 3.00 [-10.0, 24.0] |

***Notes:*** PA, Physical activity; LPA, Light Physical activity; MVPA, Moderate-to-Vigorous Physical Activity; Townsend deprivation index = a composite area-level measure of deprivation based on unemployment, non-car ownership, non-home ownership, and household overcrowding; a higher score indicates higher deprivation. BMI, body mass index; MET, metabolic equivalent of tasks; PA, physical activity; SD, standard deviation.A/AS, advanced; CSE, Certificate of Secondary Education; GCSE, General Certificate of Secondary Education; HNC, Higher National Certificate; HND, Higher National Diploma; NVQ, National Vocational Qualification. Values are mean ± SD for continuous variables and n (%) for categorical variables.

**Supplemental Table 5 Comparison of Characteristics of participants in the questionnaire-based cohort: Data exclusion (n=498,423→293,980).**

| **Variable** | **Category** | **Included Group Mean ± SD or %** | **Excluded Group Mean ± SD or %** | **Efect Size** | **P-value** |
| --- | --- | --- | --- | --- | --- |
| **Age** | Continuous | 56.8 ± 8.1 | 57.6 ± 8.0 | d=0.10 | <0.001 |
| **PM2.5 exposure** | Continuous | 10.0 ± 1.1 | 10.1 ± 1.1 | d=0.10 | <0.001 |
| **BMI** | Continuous | 27.3 ± 4.7 | 27.7 ± 5.0 | d=0.08 | <0.001 |
| **Cooked vegetable intake** | Continuous | 2.6 ± 2.5 | 2.3 ± 2.8 | d=0.12 | <0.001 |
| **Water intake** | Continuous | 2.1 ± 3.8 | 1.9 ± 4.0 | d=0.06 | <0.001 |
| **Fresh fruit intake** | Continuous | 1.9 ± 2.6 | 1.8 ± 2.8 | d=0.05 | <0.001 |
| **Neuroticism score** | Continuous | 4.0 ± 3.0 | 4.3 ± 3.3 | d=0.07 | <0.001 |
| **Townsend deprivation index** | Continuous | -1.5 ± 2.9 | -1.0 ± 3.3 | d=0.18 | <0.001 |
| **Average night time sound level of noise pollution** | Continuous | 46.6 ± 4.3 | 46.6 ± 4.3 | d=0.02 | <0.001 |
| **Time spent outdoors in winter** | Continuous | 0.3 ± 4.7 | -0.1 ± 4.8 | d=0.08 | <0.001 |
| **Time spend outdoors in summer** | Continuous | 3.3 ± 3.5 | 2.8 ± 3.9 | d=0.14 | <0.001 |
| **Sex** | Female | 52.6% | 57.0% | V=0.04 | <0.001 |
|  | Male | 47.4% | 43.0% |  |  |
| **Alcohol intake frequency** | Daily or almost daily | 21.8% | 18.1% | V=0.09 | <0.001 |
|  | Three or four times a week | 24.3% | 21.2% |  |  |
| Once or twice a week | 25.8% | 25.8% |  |  |
| One to three times a month | 10.8% | 11.7% |  |  |
| Special occasions only | 10.3% | 13.4% |  |  |
| Never | 7.0% | 9.7% |  |  |
| Prefer not to anwer | NA% | 0.3% |  |  |
| **Smoking status** | Prefer not to anwer | 0.2% | 0.7% | V=0.05 | <0.001 |
|  | No | 54.5% | 54.6% |  |  |
| Yes, on most or all days | 35.5% | 33.0% |  |  |
| Only occasionally | 9.8% | 11.7% |  |  |
| **Length of mobile phone use** | Prefer not to anwer | 0.1% | 0.6% | V=0.15 | <0.001 |
|  | Never used mobile phone at least once per week | 13.7% | 16.4% |  |  |
| One year or less | 2.4% | 3.2% |  |  |
| Two to four years | 16.4% | 19.0% |  |  |
| Five to eight years | 30.7% | 30.0% |  |  |
| More than eight years | 36.7% | 28.8% |  |  |
| Do not know | NA% | 2.0% |  |  |
| **Plays computer games** | Prefer not to anwer | 0.1% | 0.3% | V=0.03 | <0.001 |
|  | Never/rarely | 79.1% | 78.4% |  |  |
| Sometimes | 17.6% | 17.8% |  |  |
| Often | 3.3% | 3.4% |  |  |
| **Qualifications** | Prefer not to anwer | 0.5% | 1.9% | V=0.14 | <0.001 |
|  | None of the above | 13.7% | 22.3% |  |  |
| College or University degree | 35.1% | 28.3% |  |  |
| A levels/AS levels or equivalent | 11.8% | 10.1% |  |  |
| O levels/GCSEs or equivalent | 21.8% | 20.1% |  |  |
| CSEs or equivalent | 5.4% | 5.4% |  |  |
| NVQ or HND or HNC or equivalent | 6.6% | 6.6% |  |  |
| Other professional qualifications eg: nursing, teaching | 5.1% | 5.3% |  |  |
| **Average total household income before tax** | Do not know | 2.7% | 6.7% | V=0.19 | <0.001 |
|  | Prefer not to anwer | 7.6% | 13.7% |  |  |
| Less than £18,000 | 17.3% | 22.9% |  |  |
| £18,000 to £30,999 | 22.1% | 21.2% |  |  |
| £31,000 to £51,999 | 24.4% | 19.4% |  |  |
| £52,000 to £100,000 | 20.2% | 13.0% |  |  |
| Greater than £100,000 | 5.6% | 3.1% |  |  |
| **Frequency of friend family visits** | Almost daily | 11.2% | 12.4% | V=0.04 | <0.001 |
|  | 2-4 times a week | 30.6% | 31.0% |  |  |
| About once a week | 36.3% | 34.7% |  |  |
| About once a month | 13.9% | 12.7% |  |  |
| Once every few months | 6.5% | 7.0% |  |  |
| Never or almost never | 1.3% | 1.9% |  |  |
| No friends/family outside household | 0.2% | 0.4% |  |  |
| ***Notes*:** Cohen's d effect sizes: 0.2 (small), 0.5 (medium), 0.8 (large); Cramer's V effect sizes: 0.1 (small), 0.3 (medium), 0.5 (large); Townsend deprivation index = a composite area-level measure of deprivation based on unemployment, non-car ownership, non-home ownership, and household overcrowding; a higher score indicates higher deprivation. BMI, body mass index; MET, metabolic equivalent of tasks; PA, physical activity; SD, standard deviation.A/AS, advanced; CSE, Certificate of Secondary Education; GCSE, General Certificate of Secondary Education; HNC, Higher National Certificate; HND, Higher National Diploma; NVQ, National Vocational Qualification. Values are mean ± SD for continuous variables and n (%) for categorical variables | | | | | |

**Supplemental Table 6 Comparison of Characteristics of participants in the accelerometer-measured cohort: Data exclusion (n=103,684 → 63,474).**

| **Variable** | **Category** | **Included Group Mean ± SD or %** | **Excluded Group Mean ± SD or %** | **Effect Size** | **P-value** |
| --- | --- | --- | --- | --- | --- |
| **Age** | Continuous | 62.5 ± 7.8 | 62.2 ± 7.9 | d=0.04 | <0.001 |
| **PM2.5 exposure** | Continuous | 9.9 ± 1.0 | 9.9 ± 1.1 | d=0.06 | <0.001 |
| **BMI** | Continuous | 26.7 ± 4.6 | NA ± NA | d=NA | <0.001 |
| **Cooked vegetable intake** | Continuous | 2.6 ± 2.4 | 2.5 ± 2.6 | d=0.03 | <0.001 |
| **Water intake** | Continuous | 1.9 ± 3.9 | 1.9 ± 4.0 | d=0.00 | 0.517 |
| **Fresh fruit intake** | Continuous | 2.0 ± 2.5 | 1.9 ± 2.7 | d=0.02 | 0.001 |
| **Neuroticism score** | Continuous | 3.9 ± 3.1 | 3.9 ± 3.2 | d=0.00 | 0.866 |
| **Townsend deprivation index** | Continuous | -1.8 ± 2.8 | -1.6 ± 2.9 | d=0.09 | <0.001 |
| **Average night time sound level of noise pollution** | Continuous | 46.5 ± 4.2 | 46.6 ± 4.3 | d=0.02 | 0.014 |
| **Time spent outdoors in winter** | Continuous | -0.1 ± 4.7 | -0.2 ± 4.8 | d=0.02 | 0.026 |
| **Time spend outdoors in summer** | Continuous | 3.0 ± 3.4 | 2.9 ± 3.6 | d=0.05 | <0.001 |
| **Sex** | Female | 56.7% | 55.6% | V=0.01 | 0.002 |
|  | Male | 43.3% | 44.4% |  |  |
| **Alcohol intake frequency** | Daily or almost daily | 0.0% | 0.1% | V=0.02 | <0.001 |
|  | Three or four times a week | 21.8% | 21.5% |  |  |
| Once or twice a week | 26.3% | 25.1% |  |  |
| One to three times a month | 25.3% | 25.1% |  |  |
| Special occasions only | 10.9% | 11.4% |  |  |
| Never | 9.8% | 10.6% |  |  |
| Prefer not to anwer | 6.0% | 6.2% |  |  |
| **Smoking status** | Prefer not to anwer | 0.2% | 0.3% | V=0.02 | <0.001 |
|  | No | 57.2% | 57.5% |  |  |
| Yes, on most or all days | 36.4% | 35.2% |  |  |
| Only occasionally | 6.2% | 7.0% |  |  |
| **Length of mobile phone use** | Prefer not to anwer | 0.1% | 0.1% | V=0.08 | <0.001 |
|  | Never used mobile phone at least once per week | 13.3% | 13.4% |  |  |
| One year or less | 1.8% | 1.8% |  |  |
| Two to four years | 12.6% | 12.2% |  |  |
| Five to eight years | 27.7% | 26.8% |  |  |
| More than eight years | 44.6% | 44.8% |  |  |
| Do not know | NA% | 0.8% |  |  |
| **Plays computer games** | Prefer not to anwer | 0.0% | 0.1% | V=0.01 | 0.012 |
|  | Never/rarely | 76.9% | 76.9% |  |  |
| Sometimes | 18.8% | 19.0% |  |  |
| Often | 4.2% | 4.1% |  |  |
| **Qualifications** | Prefer not to anwer | 0.3% | 0.6% | V=0.03 | <0.001 |
|  | None of the above | 8.2% | 7.8% |  |  |
| College or University degree | 43.4% | 43.6% |  |  |
| A levels/AS levels or equivalent | 13.2% | 13.2% |  |  |
| O levels/GCSEs or equivalent | 20.6% | 20.1% |  |  |
| CSEs or equivalent | 3.9% | 4.4% |  |  |
| NVQ or HND or HNC or equivalent | 5.4% | 5.3% |  |  |
| Other professional qualifications eg: nursing, teaching | 5.0% | 5.0% |  |  |
| **Average total household income before tax** | Do not know | 2.3% | 2.6% | V=0.05 | <0.001 |
|  | Prefer not to anwer | 6.8% | 8.0% |  |  |
| Less than £18,000 | 12.1% | 14.7% |  |  |
| £18,000 to £30,999 | 21.5% | 22.0% |  |  |
| £31,000 to £51,999 | 26.4% | 25.2% |  |  |
| £52,000 to £100,000 | 23.9% | 21.0% |  |  |
| Greater than £100,000 | 6.9% | 6.5% |  |  |
| **Frequency of friend family visits** | Almost daily | 9.4% | 9.9% | V=0.02 | <0.001 |
|  | 2-4 times a week | 29.6% | 30.0% |  |  |
| About once a week | 37.4% | 36.6% |  |  |
| About once a month | 15.4% | 14.8% |  |  |
| Once every few months | 7.0% | 7.3% |  |  |
| Never or almost never | 1.1% | 1.4% |  |  |
| No friends/family outside household | 0.1% | 0.1% |  |  |
| ***Notes*:** Cohen's d effect sizes: 0.2 (small), 0.5 (medium), 0.8 (large); Cramer's V effect sizes: 0.1 (small), 0.3 (medium), 0.5 (large); Townsend deprivation index = a composite area-level measure of deprivation based on unemployment, non-car ownership, non-home ownership, and household overcrowding; a higher score indicates higher deprivation. BMI, body mass index; MET, metabolic equivalent of tasks; PA, physical activity; SD, standard deviation.A/AS, advanced; CSE, Certificate of Secondary Education; GCSE, General Certificate of Secondary Education; HNC, Higher National Certificate; HND, Higher National Diploma; NVQ, National Vocational Qualification. Values are mean ± SD for continuous variables and n (%) for categorical variables | | | | | |

**Supplemental Table 7 GVIF Results for Independent Model of Physical Activity and PM2.5 with Sleep in the Questionnaire-Based Cohort.**

| Variables | GVIF | Variables | GVIF |
| --- | --- | --- | --- |
| Participants' average annual PM2.5 exposure | 1.1632 | Participants' average annual PM2.5 exposure | 1.1630 |
| MVPA | 1.0489 | Walking | 1.0481 |
| Age | 1.1829 | Age | 1.1843 |
| Sex | 1.0891 | Sex | 1.0878 |
| BMI | 1.0462 | BMI | 1.0435 |
| Ethnic Background | 1.0538 | Ethnic Background | 1.0542 |
| Smoking status | 1.0231 | Smoking status | 1.0231 |
| Alcohol intake frequency | 1.0224 | Alcohol intake frequency | 1.0224 |
| Length of mobile phone use | 1.0166 | Length of mobile phone use | 1.0167 |
| Play computer games | 1.0177 | Play computer games | 1.0174 |
| Townsend deprivation index | 1.1723 | Townsend deprivation index | 1.1727 |
| Qualifications | 1.0281 | Qualifications | 1.0285 |
| Neuroticism score | 1.0276 | Neuroticism score | 1.0276 |
| Cooked vegetable intake | 1.0257 | Cooked vegetable intake | 1.0249 |
| Fresh fruit intake | 1.0383 | Fresh fruit intake | 1.0368 |
| Average total household income before tax | 1.0409 | Average total household income before tax | 1.0409 |
| Frequency of friend family visits | 1.0088 | Frequency of friend family visits | 1.0088 |
| Average night time sound level of noise pollution | 1.0495 | Average night time sound level of noise pollution | 1.0495 |
| Time spent outdoors in winter | 1.2554 | Time spent outdoors in winter | 1.2610 |
| Time spend outdoors in summer | 1.2628 | Time spend outdoors in summer | 1.2599 |

***Notes:***MVPA, moderate-to-vigorous physical activity. sleep score and sleep duration were utilized as dependent variables, with PA and PM2.5 levels serving as independent variables, adjusting for age, sex, BMI, ethnic background, smoking status, alcohol intake frequency,length of mobile phone use, plays computer games, Townsend deprivation index, neuroticism score, cooked vegetable intake, fresh fruit intake, qualifications, frequency of friend family visits, average total household income before tax, time spent outdoors in winter, average night time sound level of noise pollution, time spend outdoors in summer. visits, average total household income before tax, time spent outdoors in winter, time spend outdoors in summer. GVIF < 2 indicates no severe multicollinearity.

**Supplemental Table 8** **GVIF Results for Interaction Model of Physical Activity and PM2.5 with Sleep in the Questionnaire-Based Cohort.**

| Variables | GVIF | Variables | GVIF |
| --- | --- | --- | --- |
| Participants' average annual PM2.5 exposure | 1.0686 | Participants' average annual PM2.5 exposure | 1.0683 |
| MVPA | 1.0686 | Walking | 1.0683 |
| Age | 1.1830 | Age | 1.1843 |
| Sex | 1.0891 | Sex | 1.0879 |
| BMI | 1.0462 | BMI | 1.0435 |
| Ethnic Background | 1.0538 | Ethnic Background | 1.0543 |
| Smoking status | 1.0231 | Smoking status | 1.0231 |
| Alcohol intake frequency | 1.0224 | Alcohol intake frequency | 1.0224 |
| Length of mobile phone use | 1.0166 | Length of mobile phone use | 1.0167 |
| Play computer games | 1.0177 | Play computer games | 1.0174 |
| Townsend deprivation index | 1.1723 | Townsend deprivation index | 1.1727 |
| Qualifications | 1.0281 | Qualifications | 1.0285 |
| Neuroticism score | 1.0276 | Neuroticism score | 1.0276 |
| Cooked vegetable intake | 1.0257 | Cooked vegetable intake | 1.0250 |
| Fresh fruit intake | 1.0383 | Fresh fruit intake | 1.0368 |
| Average total household income before tax | 1.0409 | Average total household income before tax | 1.0409 |
| Frequency of friend family visits | 1.0088 | Frequency of friend family visits | 1.0088 |
| Average night time sound level of noise pollution | 1.0495 | Average night time sound level of noise pollution | 1.0495 |
| Time spent outdoors in winter | 1.2554 | Time spent outdoors in winter | 1.2611 |
| Time spend outdoors in summer | 1.2628 | Time spend outdoors in summer | 1.2599 |

***Notes:***MVPA, moderate-to-vigorous physical activity. sleep score and sleep duration were utilized as dependent variables, with an interaction term between PA and PM2.5 included, adjusting for age, sex, BMI, ethnic background, smoking status, alcohol intake frequency,length of mobile phone use, plays computer games, Townsend deprivation index, neuroticism score, cooked vegetable intake, fresh fruit intake, qualifications, frequency of friend family visits, average total household income before tax, time spent outdoors in winter, average night time sound level of noise pollution, time spend outdoors in summer. visits, average total household income before tax, time spent outdoors in winter, time spend outdoors in summer. GVIF < 2 indicates no severe multicollinearity.

**Supplemental Table 9 GVIF Results for Independent Model of Physical Activity and PM2.5 with Sleep in the Accelerometer-Measured Cohort.**

| Variables | GVIF | Variables | GVIF |
| --- | --- | --- | --- |
| Participants' average annual PM2.5 exposure | 1.1068 | Participants' average annual PM2.5 exposure | 1.1074 |
| MVPA | 1.0831 | LPA | 1.0710 |
| Age at accelerometer measurement | 1.1690 | Age at accelerometer measurement | 1.1651 |
| Sex | 1.1089 | Sex | 1.1118 |
| BMI | 1.0658 | BMI | 1.0551 |
| Ethnic Background | 1.0237 | Ethnic Background | 1.0240 |
| Smoking status | 1.0204 | Smoking status | 1.0200 |
| Alcohol intake frequency. | 1.0154 | Alcohol intake frequency. | 1.0152 |
| Length of mobile phone use | 1.0136 | Length of mobile phone use | 1.0136 |
| Play computer games | 1.0072 | Play computer games | 1.0090 |
| Townsend deprivation index | 1.1376 | Townsend deprivation index | 1.1374 |
| Neuroticism score | 1.0285 | Neuroticism score | 1.0282 |
| Cooked vegetable intake | 1.0187 | Cooked vegetable intake | 1.0192 |
| Fresh fruit intake | 1.0332 | Fresh fruit intake | 1.0323 |
| Qualifications | 1.0230 | Qualifications | 1.0231 |
| Frequency of friend family visits | 1.0084 | Frequency of friend family visits | 1.0084 |
| Average total household income before tax | 1.0334 | Average total household income before tax | 1.0335 |
| Time spent outdoors in winter | 1.2360 | Time spent outdoors in winter | 1.2285 |
| Time spend outdoors in summer | 1.2382 | Time spend outdoors in summer | 1.2385 |

***Notes:***LPA, light physical activity; MVPA, moderate-to-vigorous physical activity. sleep score and sleep duration were utilized as dependent variables, with PA and PM2.5 levels serving as independent variables, adjusting for age at accelerometer measurement, sex, BMI, ethnic background, smoking status, alcohol intake frequency,length of mobile phone use, plays computer games, Townsend deprivation index, neuroticism score, cooked vegetable intake, fresh fruit intake, qualifications, frequency of friend family visits, average total household income before tax, time spent outdoors in winter, average night time sound level of noise pollution, time spend outdoors in summer. visits, average total household income before tax, time spent outdoors in winter, time spend outdoors in summer. GVIF < 2 indicates no severe multicollinearity.

**Supplemental Table 10 GVIF Results for Interaction Model of Physical Activity and PM2.5 with Sleep in the Accelerometer-Measured Cohort.**

| Variables | GVIF | Variables | GVIF |
| --- | --- | --- | --- |
| Participants' average annual PM2.5 exposure | 1.0580 | Participants' average annual PM2.5 exposure | 1.0528 |
| MVPA | 1.0580 | LPA | 1.0528 |
| Age at accelerometer measurement | 1.1518 | Age at accelerometer measurement | 1.1465 |
| Sex | 1.1031 | Sex | 1.1060 |
| BMI | 1.0647 | BMI | 1.0530 |
| Ethnic Background | 1.0260 | Ethnic Background | 1.0265 |
| Smoking status | 1.0201 | Smoking status | 1.0197 |
| Alcohol intake frequency. | 1.0154 | Alcohol intake frequency. | 1.0151 |
| Length of mobile phone use | 1.0134 | Length of mobile phone use | 1.0134 |
| Play computer games | 1.0073 | Play computer games | 1.0092 |
| Townsend deprivation index | 1.1168 | Townsend deprivation index | 1.1160 |
| Neuroticism score | 1.0214 | Neuroticism score | 1.0212 |
| Cooked vegetable intake | 1.0189 | Cooked vegetable intake | 1.0193 |
| Fresh fruit intake | 1.0331 | Fresh fruit intake | 1.0322 |
| Qualifications | 1.0199 | Qualifications | 1.0200 |
| Frequency of friend family visits | 1.0074 | Frequency of friend family visits | 1.0075 |
| Average total household income before tax | 1.0276 | Average total household income before tax | 1.0278 |
| Time spent outdoors in winter | 1.2330 | Time spent outdoors in winter | 1.2254 |
| Time spend outdoors in summer | 1.2324 | Time spend outdoors in summer | 1.2330 |

***Notes:***MVPA, moderate-to-vigorous physical activity. sleep score and sleep duration were utilized as dependent variables, with an interaction term between PA and PM2.5 included, adjusting for age at accelerometer measurement, sex, BMI, ethnic background, smoking status, alcohol intake frequency,length of mobile phone use, plays computer games, Townsend deprivation index, neuroticism score, cooked vegetable intake, fresh fruit intake, qualifications, frequency of friend family visits, average total household income before tax, time spent outdoors in winter, average night time sound level of noise pollution, time spend outdoors in summer. visits, average total household income before tax, time spent outdoors in winter, time spend outdoors in summer. GVIF < 2 indicates no severe multicollinearity.

**Supplemental Table11 Sleep score and sleep duration change with 10 unit increase in PA and 10 μg/m3 increase in PM2.5 (Before Excluding Participants with Pre-Baseline Sleep Disorders)**

| **Models** | | **Accelerometer-measured** | |  | | **Questionnaire-based** | |
| --- | --- | --- | --- | --- | --- | --- | --- |
| Sleep score | Sleep duration |  | | Sleep score | Sleep duration |
| **Models without interaction** | | | | |
| **Model1** | **MVPA** | 0.0581 (0.0509,0.0652) *** | -0.0483 (-0.0531,-0.0432) *** | **MVPA** | | 0.0318 (0.0297,0.0338) *** | -0.0080 (-0.0092,-0.0068) *** |
| **PM2.5** | -0.3046 (-0.4781,-0.1312) *** | -0.0406 (-0.1565,0.00753) | **PM2.5** | | -0.3329 (-0.4055,-0.2602) *** | -0.0975 (-0.1394,-0.0555) *** |
| **Model2** | **LPA** | 0.0372 (0.0322,0.0423) *** | -0.1160 (-0.1192,-0.1127) *** | **Walking** | | 0.0556 (0.0517,0.0594) *** | -0.0245 (-0.0267,-0.0223) *** |
| **PM2.5** | -0.2608 (-0.4344,-0.0871) ** | -0.1769 (-0.2876,-0.0663) ** | **PM2.5** | | -0.3506 (-0.4233,-0.2779) *** | -0.0937 (-0.1357,-0.0518) *** |
| **Models with interaction** | | | | |
| **Model3** | **MVPA** | 0.0624 (0.0562,0.0686) *** | -0.0491 (-0.0532,-0.0449) *** | **MVPA** | | 0.0320 (0.0300,0.0341) *** | -0.0082 (-0.0094,-0.0070) *** |
| **PM2.5** | -0.2436(-0.3884,-0.0967) ** | -0.0726 (-0.1700,0.0247) | **PM2.5** | | -0.3165 (-0.3892,-0.2438) *** | -0.1095 (-0.1514,0.0675) *** |
| **MVPA * PM2.5** | 0.0617 (0.0065,0.1168) * | -0.0201 (-0.0570,0.0167) | **MVPA * PM2.5** | | 0.0200 (0.0018,0.0383) * | -0.0270 (-0.0375,-0.0164) *** |
| **Model4** | **LPA** | 0.0377 (0.0334,0.0420) *** | -0.1172(-0.1200,-0.1145) *** | **Walking** | | 0.0562 (0.0523,0.0600) *** | -0.0249 (-0.0271,-0.0227) *** |
| **PM2.5** | -0.1852 (-0.3312,-0.0392) * | -0.2284(-0.3213,-0.1355) *** | **PM2.5** | | -0.3364 (-0.4091,-0.2637) *** | -0.1046 (-0.1466,-0.0627) *** |
| **LPA * PM2.5** | 0.0123 (-0.0264,0.0511) | -0.0091(-0.0338,0.0155) | **Walking * PM2.5** | | 0.0627 (0.0282,0.0973) *** | -0.0464 (-0.0664,-0.0265) *** |

***Notes***: PA, Physical activity; LPA, Light Physical activity; MVPA, Moderate-to-Vigorous Physical Activity, CI, confidence interval.; For models without interaction, sleep score and sleep duration were utilized as dependent variables, with PA and PM2.5 levels serving as independent variables, adjusting for age, sex, BMI, ethnic background, smoking status, alcohol intake frequency,length of mobile phone use, plays computer games, Townsend deprivation index, neuroticism score, cooked vegetable intake, fresh fruit intake, qualifications, frequency of friend family visits, average total household income before tax, time spent outdoors in winter, average night time sound level of noise pollution, time spend outdoors in summer. For models with interaction terms employed a similar specification to those without interaction, incorporating an additional interaction term between PA and PM2.5. Numerical values indicate changes in sleep score and sleep duration corresponding to every 10 µg/m³ increase in PM2.5 and every 10 MET-hours/week increase in PA. Values within brackets denote 95% confidence intervals (CIs)

**Supplemental Table12 Sleep score and sleep duration change with 10 unit increase in PA and 10 μg/m3 increase in PM2.5 (Diagnosed With Sleep Disorder)**

| **Models** | | **Participants Sleep Disorder** | |
| --- | --- | --- | --- |
| Sleep score | Sleep duration |
| **Models without interaction** | | | |
| **Model1** | **MVPA** | 0.0410 (0.0204,0.0579) *** | -0.0102 (-0.0215,-0.0010) |
| **PM2.5** | -0.8024 (-1.4017,-0.2390) ** | -0.1762 (-0.5634,0.2110) |
| **Model2** | **Walking** | 0.0819  (0.0493,0.1146) *** | -0.0402 (-0.0619,-0.0184) *** |
| **PM2.5** | -0.8561 (-1.4271,-0.2752) ** | -0.1697 (-0.5564,0.2169) |
| **Models with interaction** | | | |
| **Model3** | **MVPA** | 0.0409 (0.0239,0.0578) *** | -0.0101 (-0.0214,-0.0011) |
| **PM2.5** | -0.8254 (-1.4072,-0.2437) ** | -0.1699 (-0.5574,0.2175) |
| **MVPA * PM2.5** | -0.0351 (-0.1810,0.1109) | -0.0434 (-0.0538,-0.1406) |
| **Model4** | **Walking** | 0.0826 (0.0499,0.0600) *** | -0.0395  (-0.0613,-0.0178) *** |
| **PM2.5** | -0.8808 (-1.4646,0.1153) ** | -0.1918 (-0.5803,0.1968) |
| **Walking * PM2.5** | -0.1246 (-0.4153,0.1662) | -0.1112  (-0.3048,0.0823) |

***Notes***: PA, Physical activity; LPA, Light Physical activity; MVPA, Moderate-to-Vigorous Physical Activity, CI, confidence interval.; For models without interaction, sleep score and sleep duration were utilized as dependent variables, with PA and PM2.5 levels serving as independent variables, adjusting for age, sex, BMI, ethnic background, smoking status, alcohol intake frequency,length of mobile phone use, plays computer games, Townsend deprivation index, neuroticism score, cooked vegetable intake, fresh fruit intake, qualifications, frequency of friend family visits, average total household income before tax, time spent outdoors in winter, average night time sound level of noise pollution, time spend outdoors in summer. For models with interaction terms employed a similar specification to those without interaction, incorporating an additional interaction term between PA and PM2.5. Numerical values indicate changes in sleep score and sleep duration corresponding to every 10 µg/m³ increase in PM2.5 and every 10 MET-hours/week increase in PA. Values within brackets denote 95% confidence intervals (CIs)





**Supplemental Figure 1. The nonlinear association of PM2.5 and PA on sleep score and sleep duration was observed in the accelerometer-measured cohort.**

*Notes:* PA, Physical activity; LPA, Light Physical activity; MPA, Moderate Physical Activity; VPA, Vigorous Physical Activity; GAM, Generalized Additive Model; CI, confidence interval; MET, metabolic equivalent of task; Total PA = LPA + MVPA; All adjusted for age, sex, BMI, smoking status, alcohol intake frequency, length of mobile phone use, plays computer games, Townsend deprivation index, neuroticism score, cooked vegetable intake, fresh fruit intake, qualifications, frequency of friend family visits, average total household income before tax, time spent outdoors in winter, time spend outdoors in summer. The shaded area is the 95% CI.





**Supplemental Figure 2. The nonlinear association of PM2.5 and the ratio of PA to sedentary time on sleep score and sleep duration was observed in the accelerometer-measured cohort.**

*Notes:* PA, Physical activity; LPA, Light Physical activity; MVPA, moderate-to-Vigorous Physical Activity; GAM, Generalized Additive Model; CI, confidence interval; MET, metabolic equivalent of task; Total PA = LPA + MVPA; The horizontal axis of Figures a-c represents the ratio of PA (MET-hours/week) to sedentary time (hours/week). All adjusted for age, sex, BMI, smoking status, alcohol intake frequency, length of mobile phone use, plays computer games, Townsend deprivation index, neuroticism score, cooked vegetable intake, fresh fruit intake, qualifications, frequency of friend family visits, average total household income before tax, time spent outdoors in winter, time spend outdoors in summer. The shaded area is the 95% CI.





**Supplemental Figure 3. Dose-response relationship of PM2.5 and PA on sleep duration. *\***

***Notes****:* PA, Physical activity; LPA, Light Physical activity; MVPA, Moderate-to-Vigorous Physical Activity; a. Dose-response surface of MVPA, annual PM2.5 concentration, and sleep duration. b. The association of MVPA on sleep duration by different PM2.5 levels. c. The association of annual PM2.5 concentration on sleep duration by different MET value of MVPA. d. Compensatory relationship between annual PM2.5 concentration and MVPA MET values to remain sleep duration unchanged.e-h similar to a-d for LPA MET values. Figure a to h represent the results from the questionnaire-based cohorts, while figure i to p represent similar analyses but conducted using the accelerometer-measured cohorts. The figure represents the distribution of participants' PM2.5 exposure levels.
